# Supplementary material
Source: publisher site journal article supplement (https://www.dovepress.com/article/269606)
Supplement: Supplementary file 1 [file get_supplementary_file.php]

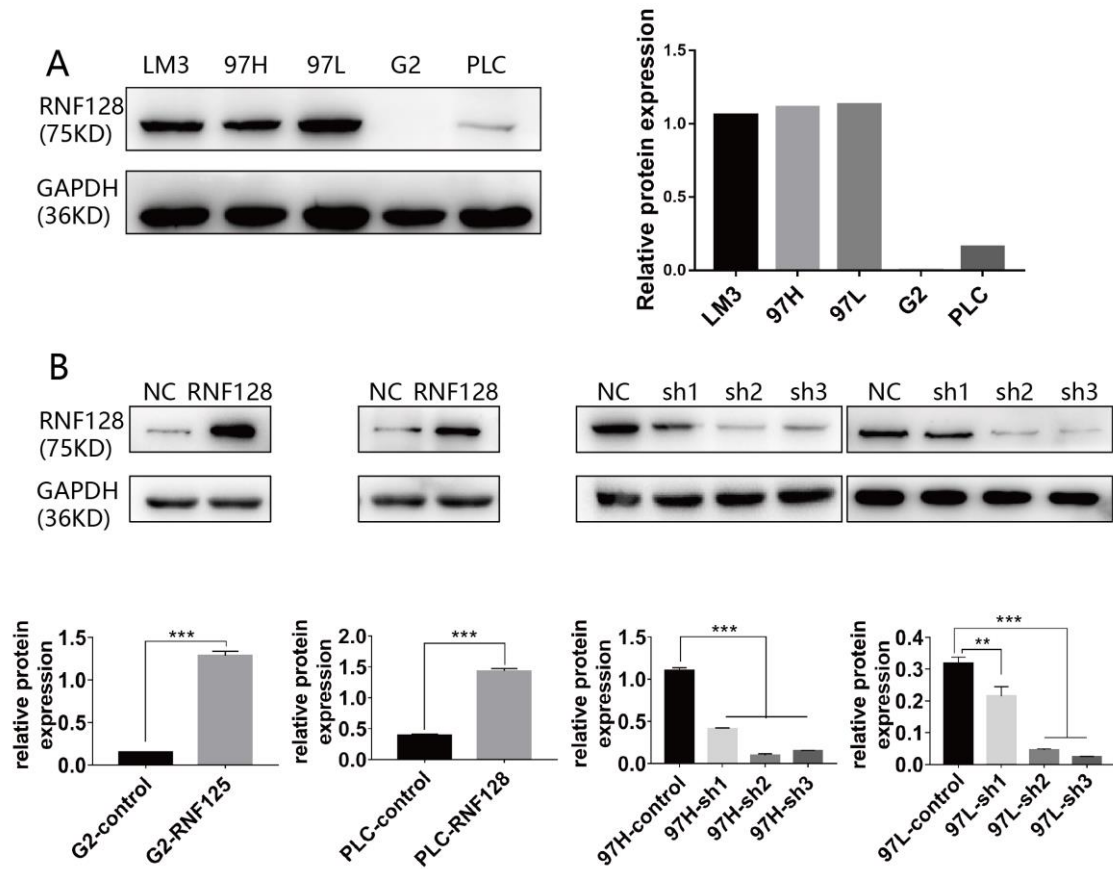

**Supplementary Figure 1:** A) RNF128 protein levels in 5 HCC cell lines were measured by western blot (HCCLM3, MHCC97-H, MHCC97-L, HepG2, PLC/PRF/5). B) RNF128 knockdown and overexpression efficiencies were examined by western blot. \*\* $p < 0.01$ ; \*\*\* $p < 0.001$ .
